# Supplementary material for: Treatment patterns of individualized real-life tapering approaches based on shared decision-making in rheumatoid arthritis
Source: Springer Nature journal article supplement (doi:10.1007/s00393-023-01380-z), 2023-06-23
Supplement: MOESM1 [file 25529188]

## Supplementary Material

*Table S1 Classification of substance group based on available anti-rheumatic substances in Germany*

| Substance Group | Abbreviation     | Name               |
|-----------------|------------------|--------------------|
| bDMARD          | ABA <sup>1</sup> | Abatacept          |
| bDMARD          | AK               | Anakinra           |
| bDMARD          | ALM <sup>1</sup> | Adalimumab         |
| bDMARD          | BEL              | Belimumab          |
| bDMARD          | CAN              | Canakinumab        |
| bDMARD          | CER <sup>1</sup> | Certolizumab Pegol |
| bDMARD          | ENC <sup>1</sup> | Etanercept         |
| bDMARD          | GOL <sup>1</sup> | Golimumab          |
| bDMARD          | GUS              | Guselkumab         |
| bDMARD          | IFX <sup>1</sup> | Infliximab         |
| bDMARD          | IXE              | Ixekizumab         |
| bDMARD          | RIT <sup>1</sup> | Rituximab          |
| bDMARD          | SAR <sup>1</sup> | Sarilumab          |
| bDMARD          | SEC              | Secukinumab        |
| bDMARD          | SIR              | Sirukumab          |
| bDMARD          | TOC <sup>1</sup> | Tocilizumab        |
| bDMARD          | UST              | Ustekinumab        |
| csDMARD         | LEF <sup>1</sup> | Leflunomid         |
| csDMARD         | MTX <sup>1</sup> | Methotrexat        |
| csDMARD         | SSZ <sup>1</sup> | Sulfasalazin       |
| tsDMARD         | APR              | Apremilast         |
| tsDMARD         | BAR <sup>1</sup> | Baricitinib        |
| tsDMARD         | TOF              | Tofacitinib        |
| tsDMARD         | UPA              | Upadacitinib       |

---

<sup>1</sup>Observed prescriptions of substances in study sample

Table S2 Descriptive statistics study population stratified by top 2 recruiting rheumatologist practices and remaining 16 rheumatologist practices

|                     | Top 2<br>Rheumatologist<br>Practices<br>n = 94 |        | Remaining<br>16 Rheumatologist<br>Practices<br>n = 106 |        |    |
|---------------------|------------------------------------------------|--------|--------------------------------------------------------|--------|----|
|                     | mean (n)                                       | sd (%) | mean (n)                                               | sd (%) |    |
| Age                 | 58.39                                          | 13.38  | 56.55                                                  | 15.52  |    |
| Female              | 0.79                                           | 0.41   | 0.73                                                   | 0.44   |    |
| RA duration         | 7.92                                           | 6.73   | 10.51                                                  | 9.96   | ** |
| DAS28-ESR           | 1.95                                           | 0.67   | 2.04                                                   | 0.67   |    |
| DAS28-CRP           | 1.73                                           | 0.43   | 1.86                                                   | 0.54   | *  |
| CDAI                | 2.22                                           | 2.23   | 2.49                                                   | 2.67   |    |
| Remission overall   | 0.97                                           | 0.18   | 0.91                                                   | 0.29   |    |
| Remission DAS28-ESR | 0.81                                           | 0.39   | 0.84                                                   | 0.37   |    |
| Remission DAS28-CRP | 0.96                                           | 0.21   | 0.84                                                   | 0.37   | ** |
| Remission CDAI      | 0.70                                           | 0.46   | 0.62                                                   | 0.49   |    |
| EQ5D                | 0.92                                           | 0.10   | 0.93                                                   | 0.10   |    |
| RADAI               | 1.27                                           | 1.15   | 1.28                                                   | 1.23   |    |

Note: Descriptive statistics study population stratified by top 2 recruiting rheumatologist practices and remaining 16 rheumatologist practices.

<sup>1</sup>standard deviation, \*\*\* p<0.01, \*\* p < 0.05, \* p< 0.1

Table S3 Descriptive statistics of study population at 6 months after first tapering

|              | csDMARD <sup>1</sup><br>n = 65 |                     | bDMARD <sup>2</sup><br>n = 30 |                     | csDMARD and<br>bDMARD<br>n = 41 |                     | tsDMARD <sup>3</sup><br>n = 4 |                     | csDMARD and<br>tsDMARD<br>n = 3 |                     | overall<br>n = 143 |                     |
|--------------|--------------------------------|---------------------|-------------------------------|---------------------|---------------------------------|---------------------|-------------------------------|---------------------|---------------------------------|---------------------|--------------------|---------------------|
|              | mean (n)                       | sd <sup>4</sup> (%) | mean (n)                      | sd <sup>4</sup> (%) | mean (n)                        | sd <sup>4</sup> (%) | mean (n)                      | sd <sup>4</sup> (%) | mean (n)                        | sd <sup>4</sup> (%) | mean (n)           | sd <sup>4</sup> (%) |
| Age          | 62.2                           | 12.5                | 53.6                          | 17.3                | 54.5                            | 11.9                | 66.3                          | 5.1                 | 52.3                            | 12.9                | 58.1               | 13.9                |
| Female       | 51                             | 78.5                | 20                            | 69.0                | 30                              | 73.2                | 3                             | 75.0                | 3                               | 100.0               | 107                | 75.4                |
| RA duration  | 6.1                            | 6.3                 | 12.9                          | 10.4                | 12.22                           | 11.6                | 10.23                         | 5.6                 | 3.63                            | 2.2                 | 9.34               | 9.5                 |
| DAS28        | 2.22                           | 0.67                | 1.94                          | 0.75                | 2.17                            | 1.03                | 2.78                          | 0.51                | 1.55                            | 0.49                | 2.16               | 0.81                |
| DAS28-CRP    | 1.90                           | 0.48                | 1.71                          | 0.49                | 2.01                            | 0.73                | 1.80                          | 0.70                | 2.10                            | 0.69                | 1.89               | 0.58                |
| CDAI         | 2.67                           | 2.43                | 2.49                          | 2.30                | 3.47                            | 4.15                | 3.38                          | 4.46                | 3.27                            | 1.94                | 2.90               | 3.05                |
| remission    | 56                             | 88.9                | 28                            | 93.3                | 34                              | 85.0                | 3                             | 75.0                | 2                               | 66.7                | 123                | 87.9                |
| seropositive | 14                             | 38.9                | 15                            | 65.2                | 16                              | 69.6                | 2                             | 100.0               | 1                               | 50.0                | 48                 | 55.8                |
| EQ5D         | 0.89                           | 0.17                | 0.92                          | 0.15                | 0.90                            | 0.13                | 0.92                          | 0.10                | 0.92                            | 0.06                | 0.90               | 0.15                |
| RADAI        | 1.41                           | 1.52                | 1.47                          | 1.41                | 1.66                            | 1.74                | 1.40                          | 1.14                | 2.07                            | 1.55                | 1.51               | 1.54                |

Note: Descriptive statistics of study population. <sup>1</sup>conventional-synthetic disease-modifying anti-rheumatic drug (DMARD), <sup>2</sup>biological DMARD, <sup>3</sup>targeted-synthetic DMARD, <sup>4</sup>standard deviation

Table S4 Descriptive statistics of study population at 12 months after first tapering

|              | csDMARD <sup>1</sup><br>n = 46 |                     | bDMARD <sup>2</sup><br>n = 25 |                     | csDMARD and<br>bDMARD<br>n = 30 |                     | tsDMARD <sup>3</sup><br>n = 3 |                     | csDMARD and<br>tsDMARD<br>n = 3 |                     | overall<br>n = 107 |                     |
|--------------|--------------------------------|---------------------|-------------------------------|---------------------|---------------------------------|---------------------|-------------------------------|---------------------|---------------------------------|---------------------|--------------------|---------------------|
|              | mean (n)                       | sd <sup>4</sup> (%) | mean (n)                      | sd <sup>4</sup> (%) | mean (n)                        | sd <sup>4</sup> (%) | mean (n)                      | sd <sup>4</sup> (%) | mean (n)                        | sd <sup>4</sup> (%) | mean (n)           | sd <sup>4</sup> (%) |
| Age          | 61.3                           | 11.1                | 51.4                          | 17.7                | 53.2                            | 10.8                | 64.0                          | 7.2                 | 52.7                            | 13.1                | 56.5               | 13.4                |
| Female       | 34                             | 73.9                | 19                            | 79.2                | 22                              | 73.3                | 2                             | 66.7                | 3                               | 100.0               | 80                 | 75.5                |
| RA duration  | 6.1                            | 5.3                 | 12.3                          | 10.4                | 12.79                           | 11.5                | 8.95                          | 5.8                 | 2.47                            | 0.2                 | 9.42               | 9.2                 |
| DAS28        | 2.24                           | 1.00                | 2.30                          | 1.09                | 2.20                            | 1.03                | 2.60                          | 0.42                | 1.50                            | 0.00                | 2.24               | 1.00                |
| DAS28-CRP    | 2.15                           | 0.88                | 1.98                          | 0.76                | 2.11                            | 0.77                | 1.33                          | 0.06                | 2.03                            | 0.61                | 2.06               | 0.80                |
| CDAI         | 4.00                           | 5.28                | 4.90                          | 4.73                | 4.30                            | 4.11                | 1.37                          | 1.52                | 4.65                            | 6.58                | 4.23               | 4.74                |
| remission    | 34                             | 73.9                | 20                            | 80.0                | 25                              | 83.3                | 3                             | 100.0               | 2                               | 66.7                | 84                 | 78.5                |
| seropositive | 12                             | 44.4                | 14                            | 73.7                | 14                              | 82.4                | 1                             | 50.0                | 2                               | 66.7                | 43                 | 63.2                |
| EQ5D         | 0.89                           | 0.15                | 0.88                          | 0.14                | 0.87                            | 0.19                | 0.92                          | 0.06                | 0.89                            | 0.11                | 0.88               | 0.16                |
| RADAI        | 1.52                           | 1.58                | 2.01                          | 1.44                | 1.76                            | 1.47                | 1.13                          | 1.03                | 2.14                            | 1.78                | 1.71               | 1.50                |

Note: Descriptive statistics of study population. <sup>1</sup>conventional-synthetic disease-modifying anti-rheumatic drug (DMARD), <sup>2</sup>biological DMARD, <sup>3</sup>targeted-synthetic DMARD, <sup>4</sup>standard deviation

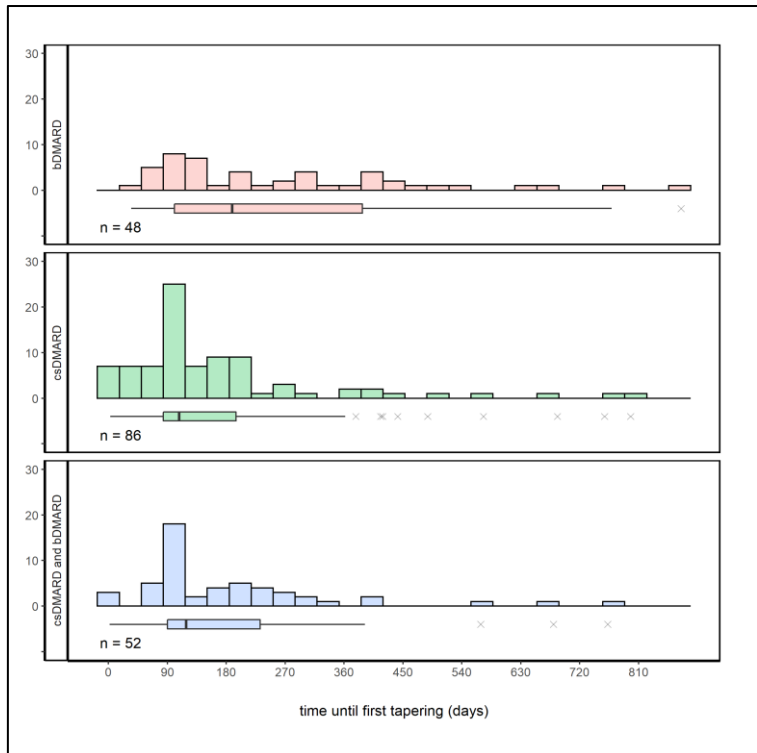

Figure S1 Time until first tapering in days after enrollment by substance group

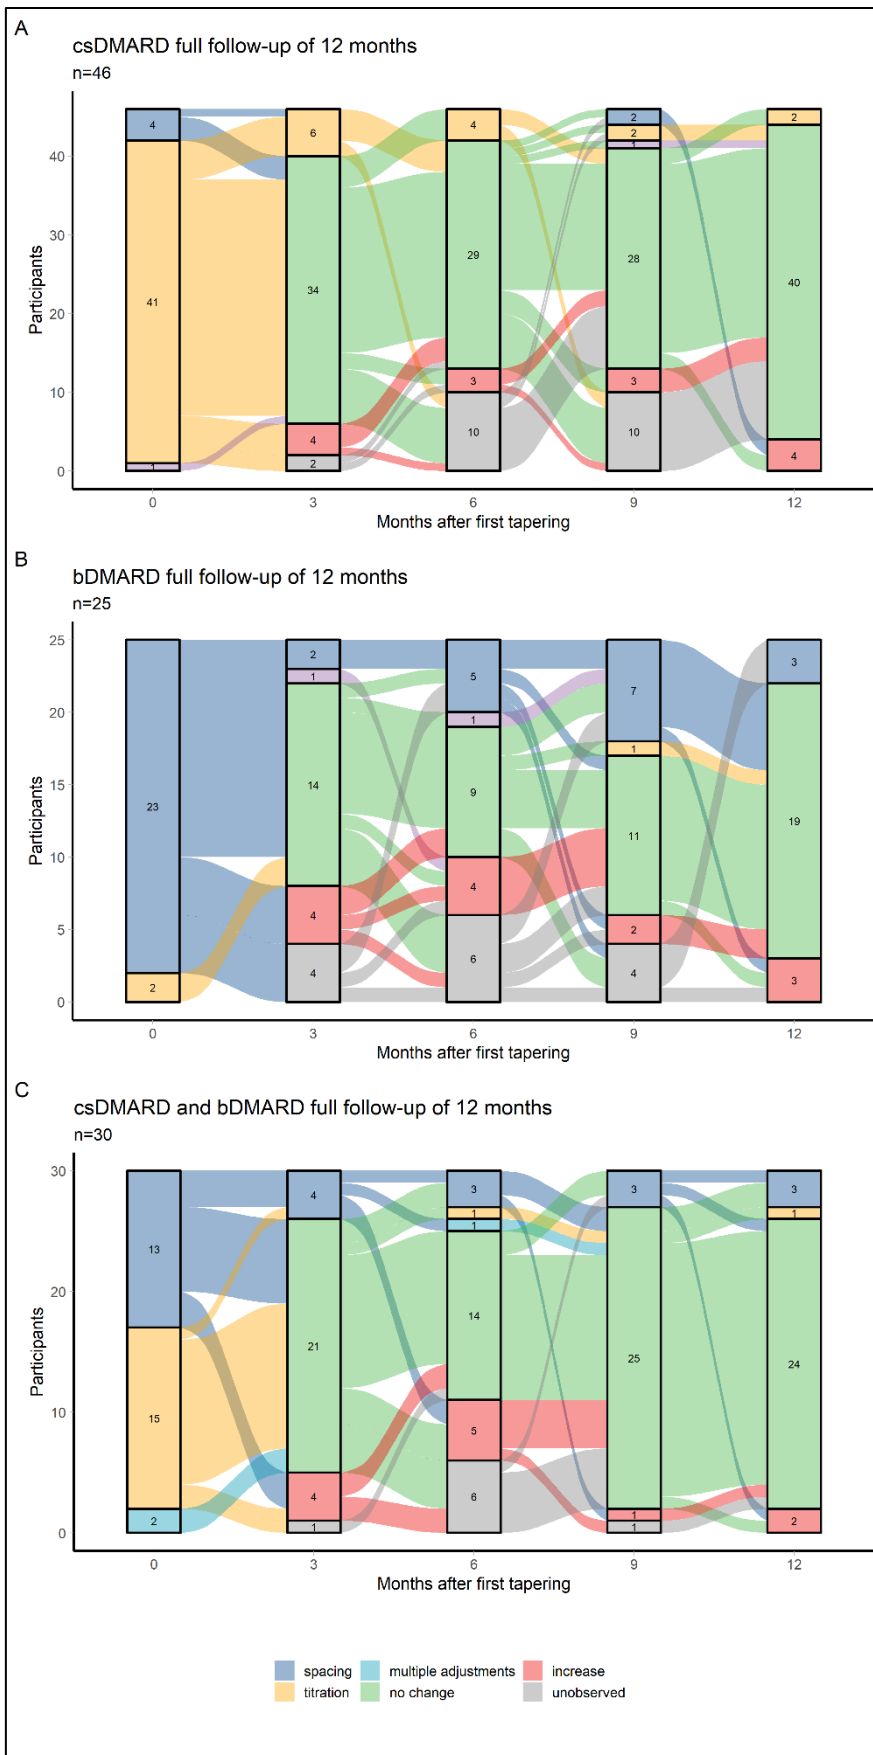

Figure S2 Alluvial plots depicting patient flows between treatment states for drug groups for patients observable at baseline and 12 months after first tapering
